# Supplementary material for: RNA-seq of THP-1 and U937 exposed to enamel matrix derivative
Source: Research Square preprint supplement (doi:10.21203/rs.3.rs-7240030/v1), 2025-10-22
Supplement: Supplementary file 1 [file Primer.docx]

CCL20 F-GCTGCTTTGATGTCAGTGCT CCL20 R-GCAGTCAAAGTTGCTTGCTG

CD38 F- AGACTGCCAAAGTGTATGGGA CD38 R-GCAAGGTACGGTCTGAGTTCC

CXCL1 F-TCCTGCATCCCCCATAGTTA CXCL1 R-CTTCAGGAACAGCCACCAGT

CXCL2 F-CCCATGGTTAAGAAAATCATCG CXCL2 R-CTTCAGGAACAGCCACCAAT

CXCL8 F- AACTTCTCCACAACCCTCTG CXCL8 R-TTGGCAGCCTTCCTGATTTC

GAPDH F-AGCCACATCGCTCAGACAC GAPDH R-GCCCAATACGACCAAATCC

ITGA2 F-GGGAATCAGTATTACACAACGGG ITGA2 R-CCACAACATCTATGAGGGAAGGG

ITGA6 F-GGCGGTGTTATGTCCTGAGTC, ITGA6 R-AATCGCCCATCACAAAAGCTC

OLR1 F-TTGCCTGGGATTAGTAGTGACC OLR1 R GCTTGCTCTTGTGTTAGGAGGT

PDGFB F-CTCGATCCGCTCCTTTGATGA PDGFB R-CGTTGGTGCGGTCTATGAG

S100A8 F-ATGCCGTCTACAGGGATGAC S100A8 R-ACACTCGGTCTCTAGCAATTTCT

S100A9 F-GGTCATAGAACACATCATGGAGG S100A9 R-GGCCTGGCTTATGGTGGTG
