# Supplementary material for: RNA-seq of THP-1 and U937 exposed to enamel matrix derivative
Source: Research Square preprint supplement (doi:10.21203/rs.3.rs-7240030/v1), 2025-10-22
Supplement: Supplementary file 4 [file VolcaNoseR - Exploring volcano plots-1.5 und 2.0.xlsx]

## Sheet: Sheet1
VolcaNoseR - Exploring volcano plots
Name	Category	Change	Fold change (log2)	Significance	Manhattan distance	Alpha
ITGAM	ITGAM	Decreased	-1.76338	20.9823	22.7457
PIK3IP1	PIK3IP1	Increased	1.93602	10.2484	12.1844
SLC12A8	SLC12A8	Decreased	-1.55389	8.1212	9.67509
SYK	SYK	Decreased	-1.62079	7.74283	9.36362
RGS2	RGS2	Decreased	-2.60526	5.87357	8.47883
GINS4	GINS4	Decreased	-3.91623	4.38969	8.30592
MMP1	MMP1	Decreased	-3.28422	4.34836	7.63258
RRM2	RRM2	Decreased	-3.47227	4.13501	7.60728
CD48	CD48	Decreased	-2.80776	4.34552	7.15328
CAV1	CAV1	Decreased	-2.84696	4.25992	7.10688
SPNS2	SPNS2	Decreased	-1.63827	5.45142	7.08969
SNX33	SNX33	Decreased	-1.76631	5.20445	6.97076
TNS1	TNS1	Decreased	-2.46261	4.39348	6.85609
APOD	APOD	Decreased	-1.89945	4.82063	6.72008
CYP19A1	CYP19A1	Decreased	-2.12405	4.49089	6.61494
GEM	GEM	Decreased	-3.53808	3.01809	6.55617
EDN1	EDN1	Decreased	-1.94743	4.37091	6.31834
ADM	ADM	Decreased	-2.68883	3.55809	6.24692
RCAN1	RCAN1	Decreased	-2.45038	3.65351	6.10389
PNOC	PNOC	Decreased	-2.41295	3.48524	5.89819
RIPOR2	RIPOR2	Increased	1.67743	3.98592	5.66335
HSD3B7	HSD3B7	Decreased	-1.53757	4.11814	5.65571
ENO2	ENO2	Decreased	-1.99915	3.55809	5.55724
HILPDA	HILPDA	Decreased	-2.58968	2.91407	5.50375
PRKAG2	PRKAG2	Decreased	-1.65546	3.64816	5.30362
ZNF395	ZNF395	Decreased	-1.69992	3.55143	5.25135
FCRLA	FCRLA	Decreased	-1.73426	3.47897	5.21323
SLC6A8	SLC6A8	Decreased	-2.2327	2.95474	5.18744
S100A8	S100A8	Increased	1.99114	3.0884	5.07954
C3AR1	C3AR1	Decreased	-2.08819	2.98196	5.07015
KLHDC7B	KLHDC7B	Decreased	-2.30193	2.74291	5.04484
RASGRP3	RASGRP3	Decreased	-1.5022	3.45629	4.95849
S100A9	S100A9	Increased	1.73455	3.22252	4.95707
GBE1	GBE1	Decreased	-1.98187	2.96001	4.94188
PDGFB	PDGFB	Decreased	-2.27776	2.65507	4.93283
JAM2	JAM2	Decreased	-2.20747	2.61011	4.81758
BNIP3	BNIP3	Decreased	-1.83695	2.66475	4.5017
ATF3	ATF3	Decreased	-1.58399	2.65507	4.23906
SLC2A1	SLC2A1	Decreased	-1.89976	2.32053	4.22029
CD38	CD38	Increased	1.73172	2.34384	4.07556
IL24	IL24	Decreased	-1.84106	2.19889	4.03995
TSKU	TSKU	Decreased	-1.66306	2.34373	4.00679
