# Supplementary material for: RNA-seq of THP-1 and U937 exposed to enamel matrix derivative
Source: Research Square preprint supplement (doi:10.21203/rs.3.rs-7240030/v1), 2025-10-22
Supplement: Supplementary file 7 [file VolcaNoseR - Exploring volcano plots-1.5 und 2.0.xlsx]

## Sheet: Sheet1
VolcaNoseR - Exploring volcano plots
Name	Category	Change	Fold change (log2)	Significance	Manhattan distance	Alpha
SPP1	SPP1	Increased	1.84734	96.9792	98.8265
IL7R	IL7R	Increased	1.93981	70.6431	72.5829
ALOX5AP	ALOX5AP	Increased	2.29348	67.4162	69.7097
ITGA6	ITGA6	Increased	1.89149	50.2196	52.1111
PROCR	PROCR	Increased	1.73017	17.5235	19.2537
SLC11A1	SLC11A1	Increased	3.97356	14.4401	18.4137
ITGA1	ITGA1	Increased	4.02719	12.2733	16.3005
LIMA1	LIMA1	Increased	1.9668	13.8158	15.7826
SNX10	SNX10	Increased	1.53819	13.7534	15.2916
TM4SF1	TM4SF1	Increased	1.76688	13.3684	15.1353
KRT79	KRT79	Increased	1.89309	12.9345	14.8276
FKBP5	FKBP5	Decreased	-1.51847	12.3423	13.8608
CCL8	CCL8	Decreased	-4.28521	9.24823	13.5334
MSR1	MSR1	Increased	2.85275	10.4625	13.3152
ITGA2	ITGA2	Increased	6.78129	5.19387	11.9752
FAP	FAP	Increased	1.72732	9.71032	11.4376
CCL1	CCL1	Decreased	-3.42214	7.42883	10.851
CYSLTR1	CYSLTR1	Decreased	-2.08517	8.64598	10.7311
RIN2	RIN2	Decreased	-2.90483	7.72128	10.6261
SLC43A2	SLC43A2	Decreased	-1.89746	8.18735	10.0848
F5	F5	Increased	2.86989	6.70767	9.57756
PDGFB	PDGFB	Decreased	-5.2676	3.17057	8.43817
SIPA1L1	SIPA1L1	Increased	1.55901	6.77344	8.33245
LILRB2	LILRB2	Decreased	-2.42563	5.02779	7.45342
MMP3	MMP3	Increased	2.86205	4.3896	7.25165
SEMA3C	SEMA3C	Increased	2.60135	4.43373	7.03508
CMKLR1	CMKLR1	Decreased	-3.48868	3.53352	7.0222
FN1	FN1	Increased	3.65045	3.36058	7.01103
OLR1	OLR1	Increased	4.58111	2.37427	6.95538
SIGLEC1	SIGLEC1	Decreased	-1.96297	4.88509	6.84806
CCL20	CCL20	Increased	1.76704	4.54642	6.31346
TMEM52B	TMEM52B	Increased	1.99292	4.30769	6.30061
PAQR5	PAQR5	Increased	2.88753	3.38275	6.27028
F2RL3	F2RL3	Decreased	-1.54542	4.36248	5.9079
GPRIN3	GPRIN3	Increased	2.15589	3.57385	5.72974
RIPOR2	RIPOR2	Decreased	-2.34835	3.31169	5.66004
MMP25	MMP25	Decreased	-1.65813	3.92393	5.58206
PTGIR	PTGIR	Decreased	-1.85003	3.69131	5.54134
IL21R	IL21R	Decreased	-1.66792	3.75802	5.42594
MACC1	MACC1	Increased	2.86461	2.40638	5.27099
C22orf42	C22orf42	Decreased	-2.22944	3.03983	5.26927
DHRS3	DHRS3	Increased	2.26887	2.82819	5.09706
PYROXD2	PYROXD2	Decreased	-1.88337	3.07718	4.96055
C5AR2	C5AR2	Decreased	-2.17762	2.70218	4.8798
PRSS23	PRSS23	Increased	2.61641	2.25906	4.87547
FHL1	FHL1	Increased	2.26571	2.55304	4.81875
ME3	ME3	Increased	1.98934	2.50338	4.49272
CCL4L2	CCL4L2	Decreased	-1.64151	2.8239	4.46541
CHST15	CHST15	Decreased	-1.97162	2.38748	4.3591
MMP7	MMP7	Decreased	-1.82801	2.47395	4.30196
CYP4F3	CYP4F3	Decreased	-2.02296	2.01153	4.03449
IQGAP3	IQGAP3	Increased	1.59505	2.42228	4.01733
CD300E	CD300E	Decreased	-1.57941	2.28866	3.86807
