# Supplementary figures and images for: RNA-seq of THP-1 and U937 exposed to enamel matrix derivative
Source: Research Square preprint supplement (doi:10.21203/rs.3.rs-7240030/v1), 2025-10-22

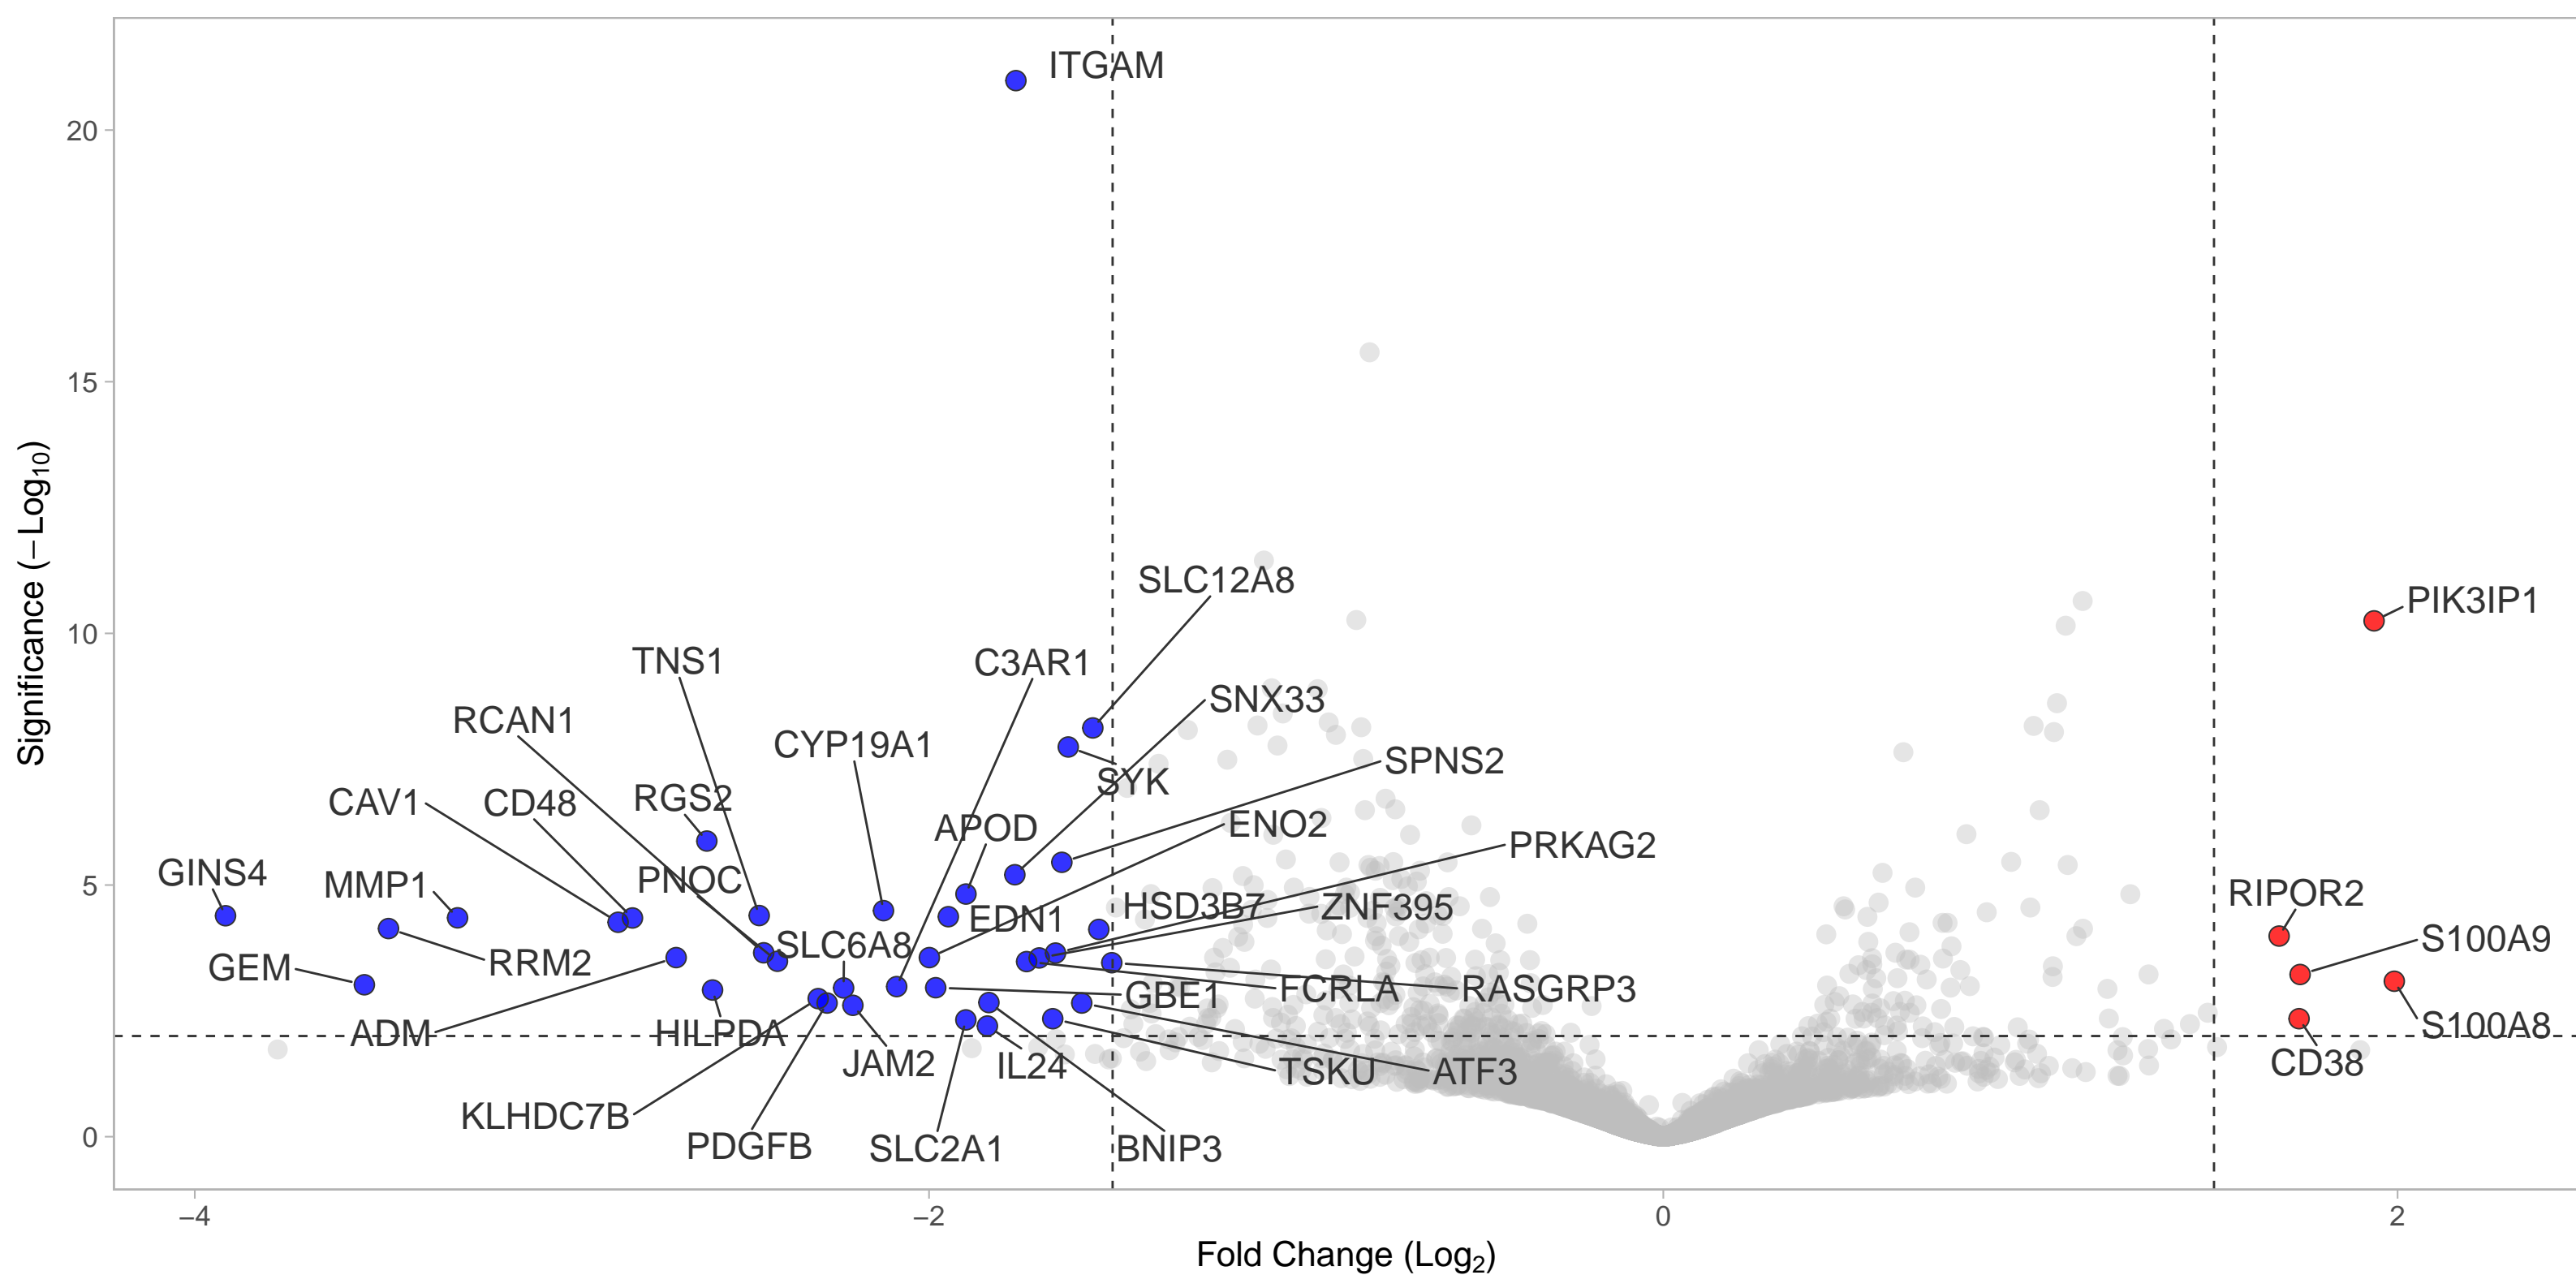

Supplement: Supplementary file 1 [file VolcaNoseR.pdf › Supplement Files/Supplement File 4/THP1/VolcaNoseR.pdf]

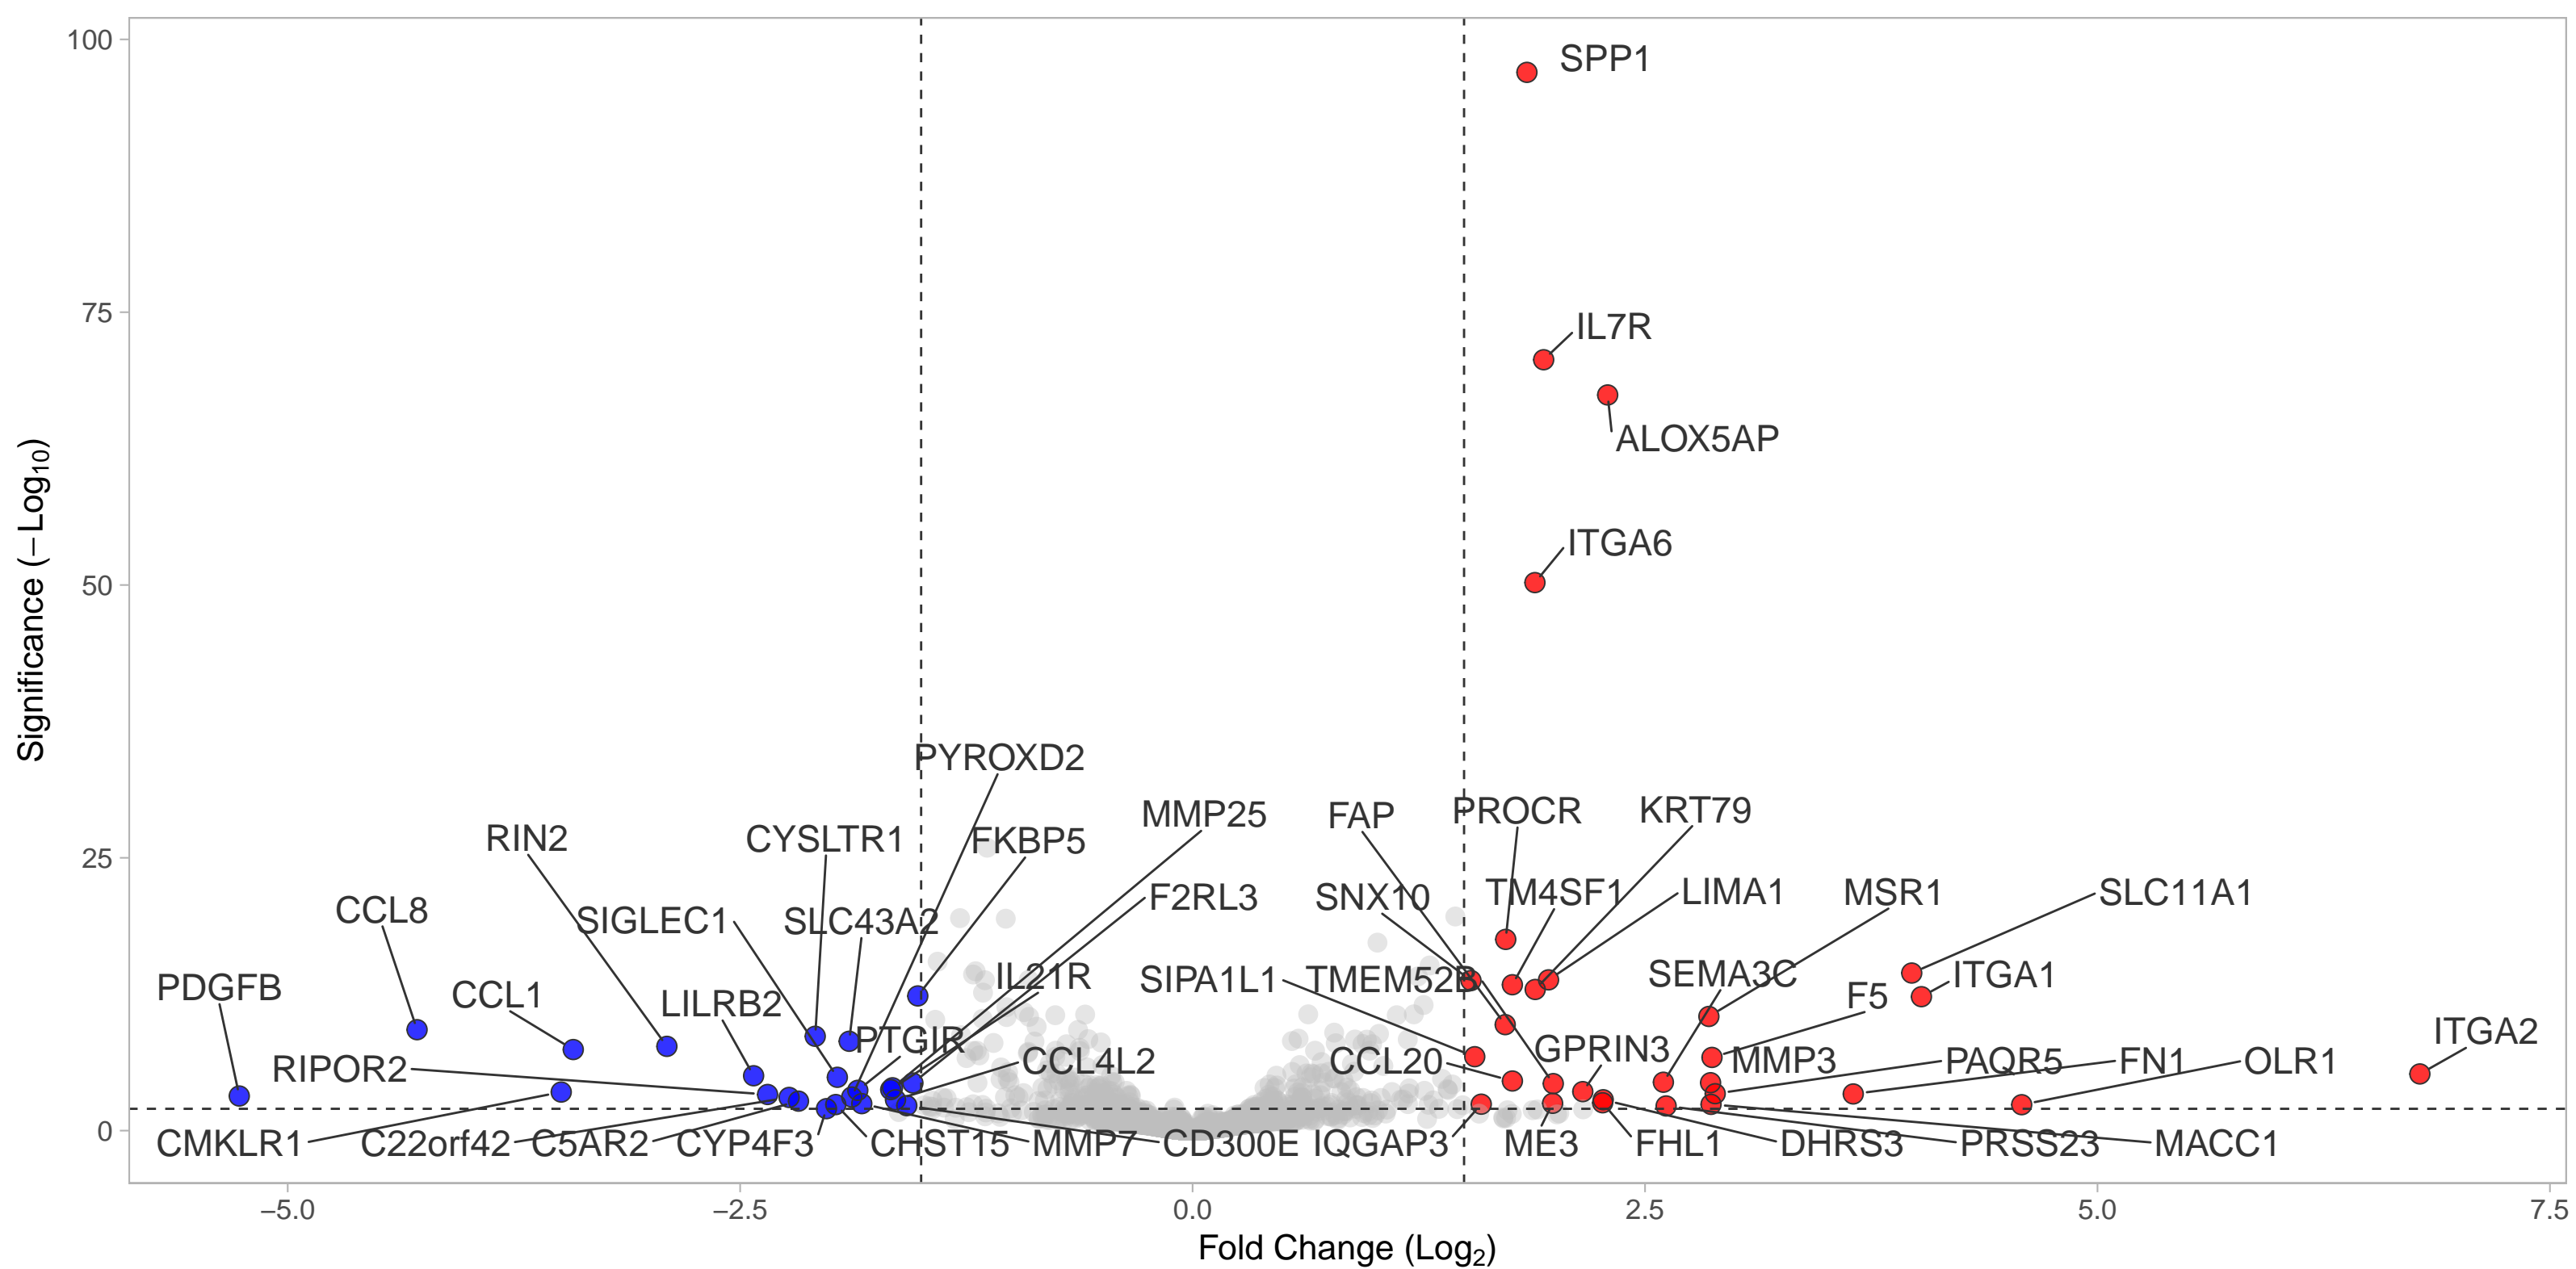

Supplement: Supplementary file 2 [file VolcaNoseR.pdf › Supplement Files/Supplement File 4/U937/VolcaNoseR.pdf]
